# Supplementary material for: Mitochondrial Proteome Studies in Seeds during Germination
Source: PubMed Central journal article supplement (PMC5217346; doi:10.3390/proteomes4020019), 2016-06-21

# Supplementary Materials: Mitochondrial Proteome Studies in Seeds during Germination

Malgorzata Czarna, Marta Kolodziejczak and Hanna Janska

**Table S1.** Overview of the dynamics of mitochondrial proteins identified in germinating seeds using gel-based and gel-free proteomic approaches in different plant species.

| Gene Locus/Accession Number | Name of Protein                                                                                    | Change in Abundance during Germination | Method | Studied Sample | Species/References                                   |
|-----------------------------|----------------------------------------------------------------------------------------------------|----------------------------------------|--------|----------------|------------------------------------------------------|
| <b>Metabolism</b>           |                                                                                                    |                                        |        |                |                                                      |
| Os02g49720                  | Aldehyde dehydrogenase                                                                             | Increased                              | iTRAQ  | Whole seed     | <i>O. sativa</i> /Han <i>et al.</i> , 2014 [1]       |
| Os02g49720                  | Mitochondrial aldehyde dehydrogenase ALDH2a                                                        | Increased under aerobic conditions     | 2DE    | Mitochondria   | <i>O. sativa</i> /Howell <i>et al.</i> , 2006 [2]    |
| Os02g49720                  | Mitochondrial aldehyde dehydrogenase ALDH2a                                                        | Decreased under anaerobic conditions   | 2DE    | Mitochondria   | <i>O. sativa</i> /Howell <i>et al.</i> , 2007 [3]    |
| Os06g15990                  | Aldehyde dehydrogenase ALDH2b                                                                      | Decreased under aerobic conditions     | 2DE    | Mitochondria   | <i>O. sativa</i> /Howell <i>et al.</i> , 2006 [2]    |
| Os06g15990                  | Aldehyde dehydrogenase ALDH2b                                                                      | Increased under anaerobic conditions   | 2DE    | Mitochondria   | <i>O. sativa</i> /Howell <i>et al.</i> , 2007 [3]    |
| AAL77005                    | Aldehyde dehydrogenase, partial                                                                    | Increased                              | 2DE    | Whole seed     | <i>P. sativum</i> /Wang <i>et al.</i> , 2012 [4]     |
| CAD70620                    | Branched-chain amino acid aminotransferase-like protein                                            | Increased                              | 2DE    | Whole seed     | <i>P. sativum</i> /Wang <i>et al.</i> , 2012 [4]     |
| ABZ10818                    | Ornithine aminotransferase                                                                         | Increased                              | 2DE    | Whole seed     | <i>P. sativum</i> /Wang <i>et al.</i> , 2012 [4]     |
| XP_002509611                | Aminomethyltransferase, putative, similar to <i>A. thaliana</i> mitochondrial-type protein COG0354 | Decreased                              | 2DE    | Whole seed     | <i>P. sativum</i> /Wang <i>et al.</i> , 2012 [4]     |
| At2g30970                   | Aspartate aminotransferase 1                                                                       | Increased                              | MS     | Whole seed     | <i>A. thaliana</i> /Law <i>et al.</i> , 2012 [5]     |
| At5g18170 or At3g03910      | Glutamate dehydrogenase 1 or 3                                                                     | Increased and neosynthesized           | 2DE    | Whole seed     | <i>A. thaliana</i> /Galland <i>et al.</i> , 2014 [6] |
| At5g18170                   | Glutamate dehydrogenase 1                                                                          | Constant and NOT neosynthesized        | 2DE    | Whole seed     | <i>A. thaliana</i> /Galland <i>et al.</i> , 2014 [6] |
| At5g07440                   | Glutamate dehydrogenase 2                                                                          | Increased and NOT neosynthesized       | 2DE    | Whole seed     | <i>A. thaliana</i> /Galland <i>et al.</i> , 2014 [6] |
| At4g37930                   | Serine hydroxymethyltransferase 1 (SHM1)                                                           | Increased                              | 2DE    | Whole seed     | <i>A. thaliana</i> /Fu <i>et al.</i> , 2005 [7]      |

|                        |                                                                          |                                                                  |     |              |                                                                                                         |
|------------------------|--------------------------------------------------------------------------|------------------------------------------------------------------|-----|--------------|---------------------------------------------------------------------------------------------------------|
| At5g26780              | Serine hydroxymethyltransferase 2 (SHM2)                                 | Increased                                                        | 2DE | Whole seed   | <i>A. thaliana</i> /Fu <i>et al.</i> , 2005 [7]                                                         |
| Os04g01590             | Arginase                                                                 | Increased under anaerobic and decreased under aerobic conditions | WB  | Mitochondria | <i>O. sativa</i> /Taylor <i>et al.</i> , 2010 [8]                                                       |
| At1g63940              | Monodehydroascorbate reductase, putative                                 | Increased                                                        | MS  | Whole seed   | <i>A. thaliana</i> /Law <i>et al.</i> , 2012 [5]                                                        |
| At1g63940              | Monodehydroascorbate reductase                                           | Increased and neosynthesized                                     | 2DE | Whole seed   | <i>A. thaliana</i> /Galland <i>et al.</i> , 2014 [6]                                                    |
| At1g63940              | Monodehydroascorbate reductase                                           | Decreased                                                        | 2DE | Whole seed   | <i>A. thaliana</i> /Fu <i>et al.</i> , 2005 [7]                                                         |
| At3g04120              | Glyceraldehyde-3-phosphate dehydrogenase, C subunit                      | Increased                                                        | MS  | Whole seed   | <i>A. thaliana</i> /Law <i>et al.</i> , 2012 [5]                                                        |
| At3g04120 or At1g13440 | Glyceraldehyde-3-phosphate dehydrogenase, C subunit                      | Increased and neosynthesized                                     | 2DE | Whole seed   | <i>A. thaliana</i> /Galland <i>et al.</i> , 2014 [6]                                                    |
| Q6RUQ2                 | Glyceraldehyde-3-phosphate dehydrogenase                                 | Decreased                                                        | 2DE | Whole seed   | <i>L. sativa</i> /Wang <i>et al.</i> , 2015 [9]                                                         |
| At3g58610              | Ketol-acid reductoisomerase                                              | Increased                                                        | MS  | Whole seed   | <i>A. thaliana</i> /Law <i>et al.</i> , 2012 [5]                                                        |
| D6QSY0                 | Ketol-acid reductoisomerase                                              | Increased                                                        | 2DE | Whole seed   | <i>L. sativa</i> /Wang <i>et al.</i> , 2015 [9]                                                         |
| At1g79440              | Succinate-semialdehyde dehydrogenase (SSADH1)                            | Increased and neosynthesized                                     | 2DE | Whole seed   | <i>A. thaliana</i> /Galland <i>et al.</i> , 2014 [6]                                                    |
| Os10g40540             | Putative enoyl-CoA-hydratase                                             | Increased under aerobic conditions                               | 2DE | Mitochondria | <i>O. sativa</i> /Howell <i>et al.</i> , 2006 [2]                                                       |
| Os03g52690             | Unknown protein (homology to inosine-5'-monophosphatase dehydrogenase)   | Increased under aerobic conditions                               | 2DE | Mitochondria | <i>O. sativa</i> /Howell <i>et al.</i> , 2006 [2]                                                       |
| <b>Respiration</b>     |                                                                          |                                                                  |     |              |                                                                                                         |
| AtMg00070              | Nad9                                                                     | Increased                                                        | WB  | Whole seed   | <i>A. thaliana</i> /Law <i>et al.</i> , 2012 [5]                                                        |
| At5g67590              | Ndufs4                                                                   | Increased                                                        | WB  | Whole seed   | <i>A. thaliana</i> /Law <i>et al.</i> , 2012 [5]                                                        |
| At5g37510              | NADH-ubiquinone oxidoreductase 75 kDa subunit, mitochondrial [Precursor] | Decreased and NOT neosynthesized                                 | 2DE | Whole seed   | <i>A. thaliana</i> /Galland <i>et al.</i> , 2014 [6]                                                    |
| At5g13440              | Rieske protein (RISP)                                                    | Increased                                                        | WB  | Whole seed   | <i>A. thaliana</i> /Law <i>et al.</i> , 2012 [5]                                                        |
| Q6H4M9                 | Rieske protein (RISP)                                                    | Increased under aerobic conditions                               | WB  | Mitochondria | <i>O. sativa</i> /Howell <i>et al.</i> , 2006 [2];<br><i>O. sativa</i> /Howell <i>et al.</i> , 2007 [3] |
| Q6H4M9                 | Rieske protein (RISP)                                                    | Slightly increased under anaerobic conditions                    | WB  | Mitochondria | <i>O. sativa</i> /Howell <i>et al.</i> , 2007 [3]                                                       |

|                                                   |                                                     |                                                                      |        |              |                                                                                         |
|---------------------------------------------------|-----------------------------------------------------|----------------------------------------------------------------------|--------|--------------|-----------------------------------------------------------------------------------------|
| At1g22840                                         | Cyt c                                               | Increased                                                            | WB     | Whole seed   | <i>A. thaliana</i> /Law et al., 2012 [5]                                                |
| Q0DI31                                            | Cyt c                                               | Increased under aerobic conditions                                   | WB     | Mitochondria | <i>O. sativa</i> /Howell et al., 2006 [2];<br><i>O. sativa</i> /Howell et al., 2007 [3] |
| Q0DI31                                            | Cyt c                                               | Low and constant under anaerobic conditions                          | WB     | Mitochondria | <i>O. sativa</i> /Howell et al., 2007 [3]                                               |
| Osm1g00330                                        | Cox2                                                | Increased under aerobic and constant under anaerobic conditions      | WB     | Mitochondria | <i>O. sativa</i> /Howell et al., 2007 [3]                                               |
| P05493                                            | ATP synthase subunit alpha, mitochondrial           | Decreased                                                            | 2DE    | Whole seed   | <i>P. sativum</i> /Wang et al., 2012 [4]                                                |
| AtMg01190                                         | ATP synthase subunit alpha, mitochondrial           | Decreased and neosynthesized                                         | 2DE    | Whole seed   | <i>A. thaliana</i> /Galland et al., 2014 [6]                                            |
| P05494                                            | ATP synthase subunit alpha, mitochondrial           | Constant                                                             | WB     | Mitochondria | <i>Z. mays</i> /Logan et al., 2001 [10]                                                 |
| P15998                                            | ATP synthase, alpha subunit                         | Increased under aerobic conditions/Constant under aerobic conditions | 2DE/WB | Mitochondria | <i>O. sativa</i> /Howell et al., 2006 [2];<br><i>O. sativa</i> /Howell et al., 2007 [3] |
| P15998                                            | ATP synthase, alpha subunit                         | Constant under anaerobic conditions                                  | WB     | Mitochondria | <i>O. sativa</i> /Howell et al., 2007 [3]                                               |
| Os09g08910                                        | ATP synthase, alpha subunit                         | Decreased                                                            | iTRAQ  | Whole seed   | <i>O. sativa</i> /Han et al., 2014 [1]                                                  |
| CBY80071                                          | ATP synthase beta subunit                           | Decreased                                                            | 2DE    | Whole seed   | <i>P. sativum</i> /Wang et al., 2012 [4]                                                |
| P19023                                            | ATP synthase beta subunit                           | Constant                                                             | WB     | Mitochondria | <i>Z. mays</i> /Logan et al., 2001 [10]                                                 |
| At5g08690                                         | ATP synthase beta subunit                           | Constant                                                             | WB     | Whole seed   | <i>A. thaliana</i> /Law et al., 2012 [5]                                                |
| At5g08670                                         | ATP synthase beta subunit                           | Increased and neosynthesized                                         | 2DE    | Whole seed   | <i>A. thaliana</i> /Galland et al., 2014 [6]                                            |
| Os01g49190                                        | ATP synthase, beta subunit                          | Increased under aerobic conditions                                   | 2DE    | Mitochondria | <i>O. sativa</i> /Howell et al., 2006 [2]                                               |
| <b>Tricarboxylic acid cycle/Carbon metabolism</b> |                                                     |                                                                      |        |              |                                                                                         |
| P31023                                            | Dihydrolipoyl dehydrogenase, mitochondrial          | Increased                                                            | 2DE    | Whole seed   | <i>P. sativum</i> /Wang et al., 2012 [4]                                                |
| At3g17240 or At1g48030                            | Dihydrolipoamide dehydrogenase 2 or 1 mitochondrial | Increased and NOT neosynthesized                                     | 2DE    | Whole seed   | <i>A. thaliana</i> /Galland et al., 2014 [6]                                            |
| B4FML9                                            | Pyruvate dehydrogenase E1, alpha subunit            | Increased                                                            | WB     | Mitochondria | <i>Z. mays</i> /Logan et al., 2001 [10]                                                 |
| Os02g0739600                                      | Pyruvate dehydrogenase E1, alpha subunit            | Increased under aerobic conditions                                   | WB     | Mitochondria | <i>O. sativa</i> /Howell et al., 2006 [2];<br><i>O. sativa</i> /Howell et al., 2007 [3] |
| Os02g0739600                                      | Pyruvate dehydrogenase E1, alpha subunit            | Low and constant under anaerobic conditions                          | WB     | Mitochondria | <i>O. sativa</i> /Howell et al., 2007 [3]                                               |
| AFJ15126                                          | Pyruvate dehydrogenase E1, alpha subunit            | Constant                                                             | 2DE    | Whole seed   | <i>L. sativa</i> /Wang et al., 2015 [9]                                                 |

|                       |                                                                                |                                             |     |              |                                                                                                      |
|-----------------------|--------------------------------------------------------------------------------|---------------------------------------------|-----|--------------|------------------------------------------------------------------------------------------------------|
| Atg59900              | Pyruvate dehydrogenase E1, alpha subunit                                       | Increased                                   | 2DE | Whole seed   | <i>A. thaliana</i> /Fu <i>et al.</i> , 2005 [7]                                                      |
| Os09g33500            | Putative pyruvate dehydrogenase E1, beta subunit, isoform 3                    | Increased under aerobic conditions          | 2DE | Mitochondria | <i>O. sativa</i> /Howell <i>et al.</i> , 2006 [2]                                                    |
| Os09g33500            | Putative pyruvate dehydrogenase E1, beta subunit, isoform 1                    | Decreased under anaerobic conditions        | 2DE | Mitochondria | <i>O. sativa</i> /Howell <i>et al.</i> , 2007 [3]                                                    |
| Os06g30460/Os02g31040 | Pyruvate dehydrogenase/2-oxo-glutarate dehydrogenase complex, E2 component     | Increased under aerobic conditions          | WB  | Mitochondria | <i>O. sativa</i> /Howell <i>et al.</i> , 2006 [2]; <i>O. sativa</i> /Howell <i>et al.</i> , 2007 [3] |
| Os06g30460/Os02g31040 | Pyruvate dehydrogenase/2-oxo-glutarate dehydrogenase complex, E2 component     | Low and constant under anaerobic conditions | WB  | Mitochondria | <i>O. sativa</i> /Howell <i>et al.</i> , 2007 [3]                                                    |
| B7ZWY9                | Citrate synthase                                                               | Increased                                   | WB  | Mitochondria | <i>Z. mays</i> /Logan <i>et al.</i> , 2001 [10]                                                      |
| At2g44350             | Citrate synthase                                                               | Increased and NOT neosynthesized            | 2DE | Whole seed   | <i>A. thaliana</i> /Galland <i>et al.</i> , 2014 [6]                                                 |
| At2g05710             | Citrate hydro-lyase/aconitase, putative                                        | Increased                                   | MS  | Whole seed   | <i>A. thaliana</i> /Law <i>et al.</i> , 2012 [5]                                                     |
| At2g05710             | Aconitate hydratase 3                                                          | Increased and neosynthesized                | 2DE | Whole seed   | <i>A. thaliana</i> /Galland <i>et al.</i> , 2014 [6]                                                 |
| At5g08300             | Succinyl-CoA ligase (GDP-forming) alpha-chain, mitochondrial                   | Constant and neosynthesized                 | 2DE | Whole seed   | <i>A. thaliana</i> /Galland <i>et al.</i> , 2014 [6]                                                 |
| At2g20420             | Succinyl-CoA ligase beta-chain (mitochondrial precursor)                       | Constant and NOT neosynthesized             | 2DE | Whole seed   | <i>A. thaliana</i> /Galland <i>et al.</i> , 2014 [6]                                                 |
| Os02g40830            | Putative succinyl-CoA ligase (GDP-forming) beta-chain, mitochondrial precursor | Increased under aerobic conditions          | 2DE | Mitochondria | <i>O. sativa</i> /Howell <i>et al.</i> , 2006 [2]                                                    |
| Os02g40830            | Putative succinyl-CoA ligase (GDP-forming) beta-chain, mitochondrial precursor | Decreased under anaerobic conditions        | 2DE | Mitochondria | <i>O. sativa</i> /Howell <i>et al.</i> , 2007 [3]                                                    |
| At5g66760             | Succinate dehydrogenase [ubiquinone] flavoprotein subunit, mitochondrial       | Constant and neosynthesized                 | 2DE | Whole seed   | <i>A. thaliana</i> /Galland <i>et al.</i> , 2014 [6]                                                 |

|                         |                                                                          |                                               |     |              |                                                                                                      |
|-------------------------|--------------------------------------------------------------------------|-----------------------------------------------|-----|--------------|------------------------------------------------------------------------------------------------------|
| Os07g04240              | Succinate dehydrogenase [ubiquinone] flavoprotein subunit, mitochondrial | Decreased                                     | 2DE | Whole seed   | <i>O. sativa</i> /Han <i>et al.</i> , 2014 [1]                                                       |
| At1g53240               | Malate dehydrogenase (NAD), mitochondrial                                | Increased                                     | MS  | Whole seed   | <i>A. thaliana</i> /Law <i>et al.</i> , 2012 [5]                                                     |
| At3g47520               | Malate dehydrogenase                                                     | Increased                                     | MS  | Whole seed   | <i>A. thaliana</i> /Law <i>et al.</i> , 2012 [5]                                                     |
| At1g53240               | Malate dehydrogenase (mitochondrial precursor)                           | Increased and NOT neosynthesized              | 2DE | Whole seed   | <i>A. thaliana</i> /Galland <i>et al.</i> , 2014 [6]                                                 |
| At1g53240               | Malate dehydrogenase (NAD), mitochondrial                                | Increased                                     | 2DE | Whole seed   | <i>A. thaliana</i> /Fu <i>et al.</i> , 2005 [7]                                                      |
| Os01g46070              | Malate dehydrogenase, NAD-dependent                                      | Increased under aerobic conditions            | 2DE | Mitochondria | <i>O. sativa</i> /Howell <i>et al.</i> , 2006 [2]                                                    |
| At4g37870               | Phosphoenolpyruvate carboxykinase (ATP)                                  | Increased                                     | MS  | Whole seed   | <i>A. thaliana</i> /Law <i>et al.</i> , 2012 [5]                                                     |
| At4g37870               | Phosphoenolpyruvate carboxykinase (ATP)                                  | Increased                                     | 2DE | Whole seed   | <i>A. thaliana</i> /Gallardo <i>et al.</i> , 2001 [11]                                               |
| At4g37870               | Phosphoenolpyruvate carboxykinase (ATP)                                  | Increased and neosynthesized                  | 2DE | Whole seed   | <i>A. thaliana</i> /Galland <i>et al.</i> , 2014 [6]                                                 |
| At4g37870               | Phosphoenolpyruvate carboxykinase (ATP)                                  | Increased                                     | 2DE | Whole seed   | <i>A. thaliana</i> /Fu <i>et al.</i> , 2005 [7]                                                      |
| At5g14780               | Formate dehydrogenase (FDH)                                              | Constant and NOT neosynthesized               | 2DE | Whole seed   | <i>A. thaliana</i> /Galland <i>et al.</i> , 2014 [6]                                                 |
| <b>Import/Transport</b> |                                                                          |                                               |     |              |                                                                                                      |
| Q5JJ14                  | Tom20                                                                    | Decreased under aerobic conditions            | WB  | Mitochondria | <i>O. sativa</i> /Howell <i>et al.</i> , 2006 [2]; <i>O. sativa</i> /Howell <i>et al.</i> , 2007 [3] |
| Q5JJ14                  | Tom20                                                                    | High and decreased under anaerobic conditions | WB  | Mitochondria | <i>O. sativa</i> /Howell <i>et al.</i> , 2007 [3]                                                    |
| At3g20000               | Tom40                                                                    | Increased                                     | WB  | Whole seed   | <i>A. thaliana</i> /Law <i>et al.</i> , 2012 [5]                                                     |

|                                                       |                                                                              |                                                                         |       |              |                                                                                                      |
|-------------------------------------------------------|------------------------------------------------------------------------------|-------------------------------------------------------------------------|-------|--------------|------------------------------------------------------------------------------------------------------|
| Os01g16910                                            | Tom40                                                                        | Decreased under aerobic conditions                                      | 2DE   | Mitochondria | <i>O. sativa</i> /Howell <i>et al.</i> , 2006 [2]                                                    |
| Os03g19290                                            | Import inner membrane translocase subunit (TIM17/TIM22/TIM23 family protein) | Decreased under aerobic conditions                                      | 2DE   | Mitochondria | <i>O. sativa</i> /Howell <i>et al.</i> , 2006 [2]                                                    |
| Os03g19290                                            | Import inner membrane translocase subunit (TIM17/TIM22/TIM23 family protein) | Increased under anaerobic conditions                                    | 2DE   | Mitochondria | <i>O. sativa</i> /Howell <i>et al.</i> , 2007 [3]                                                    |
| Os01g19770                                            | Stress-inducible membrane pore protein (TIM17/TIM22/TIM23 family protein)    | Decreased under aerobic conditions                                      | 2DE   | Mitochondria | <i>O. sativa</i> /Howell <i>et al.</i> , 2006 [2]                                                    |
| Os01g19770                                            | Stress-inducible membrane pore protein (TIM17/TIM22/TIM23 family protein)    | Increased under anaerobic conditions                                    | 2DE   | Mitochondria | <i>O. sativa</i> /Howell <i>et al.</i> , 2007 [3]                                                    |
| At1g20350                                             | Tim17-1                                                                      | Constant                                                                | WB    | Whole seed   | <i>A. thaliana</i> /Law <i>et al.</i> , 2012 [5]                                                     |
| At2g37410                                             | Tim17-2                                                                      | Increased                                                               | WB    | Whole seed   | <i>A. thaliana</i> /Law <i>et al.</i> , 2012 [5]                                                     |
| At4g16160                                             | Mitochondrial import inner membrane translocase subunit                      | Decreased                                                               | 2DE   | Whole seed   | <i>A. thaliana</i> /Fu <i>et al.</i> , 2005 [7]                                                      |
| Os09g19734                                            | Mitochondrial outer membrane protein, porin                                  | Increased                                                               | iTRAQ | Whole seed   | <i>O. sativa</i> /Han <i>et al.</i> , 2014 [1]                                                       |
| Os05g45950                                            | Outer mitochondrial membrane porin                                           | Decreased                                                               | iTRAQ | Whole seed   | <i>O. sativa</i> /Han <i>et al.</i> , 2014 [1]                                                       |
| Os09g19734                                            | VDAC                                                                         | Constant under aerobic conditions or increased under aerobic conditions | WB    | Mitochondria | <i>O. sativa</i> /Howell <i>et al.</i> , 2006 [2]; <i>O. sativa</i> /Howell <i>et al.</i> , 2007 [3] |
| Os09g19734                                            | VDAC                                                                         | Increased under anaerobic conditions                                    | WB    | Mitochondria | <i>O. sativa</i> /Howell <i>et al.</i> , 2007 [3]                                                    |
| Q9SPD9, Q9SPD8, Q9SPD7                                | Porin                                                                        | Increased                                                               | WB    | Mitochondria | <i>Z. mays</i> /Logan <i>et al.</i> , 2001 [10]                                                      |
| At3g01280, At5g67500, At5g15090, At5g57490, At3g49920 | VDAC                                                                         | Increased                                                               | WB    | Whole seed   | <i>A. thaliana</i> /Law <i>et al.</i> , 2012 [5]                                                     |

|                        |                                                       |                                                                  |       |              |                                                   |
|------------------------|-------------------------------------------------------|------------------------------------------------------------------|-------|--------------|---------------------------------------------------|
| At5g15090              | VDAC3                                                 | Increased                                                        | 2DE   | Whole seed   | <i>A. thaliana</i> /Fu <i>et al.</i> , 2005 [7]   |
| Os02g48720/Os05g23720  | Adenine nucleotide translocator                       | Slightly decreased under anaerobic and aerobic conditions        | MS    | Mitochondria | <i>O. sativa</i> /Taylor <i>et al.</i> , 2010 [8] |
| P04709, P12857         | Adenine nucleotide translocator                       | Increased                                                        | WB    | Mitochondria | <i>Z. mays</i> /Logan <i>et al.</i> , 2001 [10]   |
| At3g08580              | AAC1 (ADP/ATP CARRIER 1); ATP:ADP antiporter/ binding | Increased                                                        | MS    | Whole seed   | <i>A. thaliana</i> /Law <i>et al.</i> , 2012 [5]  |
| At5g13490              | AAC2 (ADP/ATP CARRIER 2); ATP:ADP antiporter/ binding | Increased                                                        | MS    | Whole seed   | <i>A. thaliana</i> /Law <i>et al.</i> , 2012 [5]  |
| Os02g52860, Os06g10810 | Mitochondrial phosphate transporter                   | Constant under anaerobic and decreased under aerobic conditions  | MS    | Mitochondria | <i>O. sativa</i> /Taylor <i>et al.</i> , 2010 [8] |
| Os05g11780             | Dicarboxylate/tricarboxylate carrier                  | Slightly increased under anaerobic and aerobic conditions        | MS    | Mitochondria | <i>O. sativa</i> /Taylor <i>et al.</i> , 2010 [8] |
| Os11g48040             | Putative uncoupling protein                           | Increased under anaerobic and decreased under aerobic conditions | MS    | Mitochondria | <i>O. sativa</i> /Taylor <i>et al.</i> , 2010 [8] |
| Os11g48040             | Uncoupling protein                                    | Increased under aerobic conditions                               | WB    | Mitochondria | <i>O. sativa</i> /Howell <i>et al.</i> , 2006 [2] |
| Os10g42299             | Basic amino acid carrier                              | Increased under anaerobic and aerobic conditions                 | SRM   | Mitochondria | <i>O. sativa</i> /Taylor <i>et al.</i> , 2010 [8] |
| Os02g10800             | Mitochondrial carrier protein                         | Decreased                                                        | iTRAQ | Whole seed   | <i>O. sativa</i> /Han <i>et al.</i> , 2014 [1]    |
| Os02g48720             | Mitochondrial carrier protein                         | Decreased                                                        | iTRAQ | Whole seed   | <i>O. sativa</i> /Han <i>et al.</i> , 2014 [1]    |
| <b>Stress response</b> |                                                       |                                                                  |       |              |                                                   |
| Os05g25850             | Superoxide dismutase                                  | Increased                                                        | 2DE   | Whole seed   | <i>O. sativa</i> /Han <i>et al.</i> , 2014 [1]    |
| Os05g25850             | Manganese superoxide dismutase                        | Decreased under aerobic                                          | 2DE   | Mitochondria | <i>O. sativa</i> /Howell <i>et al.</i> ,          |

|                                          |                                                          |                                      |       |              |                                                      |
|------------------------------------------|----------------------------------------------------------|--------------------------------------|-------|--------------|------------------------------------------------------|
|                                          |                                                          | conditions                           |       |              | 2006 [2]                                             |
| P27084                                   | Superoxide dismutase [Mn], mitochondrial                 | Increased                            | 2DE   | Whole seed   | <i>P. sativum</i> /Wang <i>et al.</i> , 2012 [4]     |
| ABH11434                                 | Mn-superoxide dismutase II                               | Increased                            | 2DE   | Whole seed   | <i>L. sativa</i> /Wang <i>et al.</i> , 2015 [9]      |
| At3g56350                                | Superoxide dismutase (Mn), MSD2                          | Decreased and neosynthesized         | 2DE   | Whole seed   | <i>A. thaliana</i> /Galland <i>et al.</i> , 2014 [6] |
| At3g10920                                | Superoxide dismutase (Mn), MSD1                          | Decreased and NOT neosynthesized     | 2DE   | Whole seed   | <i>A. thaliana</i> /Galland <i>et al.</i> , 2014 [6] |
| Os01g58970                               | Cytochrome P450 protein                                  | Increased                            | 2DE   | Whole seed   | <i>O. sativa</i> /Han <i>et al.</i> , 2014 [1]       |
| At1g20620                                | Catalase 3                                               | Increased                            | MS    | Whole seed   | <i>A. thaliana</i> /Law <i>et al.</i> , 2012 [5]     |
| At1g20620                                | Catalase 3                                               | Increased                            | 2DE   | Whole seed   | <i>A. thaliana</i> /Fu <i>et al.</i> , 2005 [7]      |
| <b>Chaperones and proteolytic system</b> |                                                          |                                      |       |              |                                                      |
| Os01g39250                               | OsFTSH4 FTSH protease, homologue of AtFTSH4              | Increased                            | iTRAQ | Whole seed   | <i>O. sativa</i> /Han <i>et al.</i> , 2014 [1]       |
| Os02g57060                               | C-terminal processing peptidase homologue                | Increased                            | 2DE   | Whole seed   | <i>O. sativa</i> /Han <i>et al.</i> , 2014 [1]       |
| XP_002284370                             | Probable mitochondrial-processing peptidase subunit beta | Decreased                            | 2DE   | Whole seed   | <i>L. sativa</i> /Wang <i>et al.</i> , 2015 [9]      |
| At3g02090                                | Putative mitochondrial processing peptidase subunit beta | Increased and neosynthesized         | 2DE   | Whole seed   | <i>A. thaliana</i> /Galland <i>et al.</i> , 2014 [6] |
| Os01g53700, Os0g09560                    | Mitochondrial processing peptidase subunit alpha         | Decreased under anaerobic conditions | 2DE   | Mitochondria | <i>O. sativa</i> /Howell <i>et al.</i> , 2007 [3]    |
| Os03g11410                               | Mitochondrial processing peptidase subunit beta          | Decreased under anaerobic conditions | 2DE   | Mitochondria | <i>O. sativa</i> /Howell <i>et al.</i> , 2007 [3]    |
| At5g20720                                | Chaperonin 20; calmodulin binding                        | Increased                            | MS    | Whole seed   | <i>A. thaliana</i> /Law <i>et al.</i> , 2012 [5]     |
| Os12g32990                               | Putative heat-shock protein                              | Increased under aerobic conditions   | 2DE   | Mitochondria | <i>O. sativa</i> /Howell <i>et al.</i> , 2006 [2]    |
| Os10g32550                               | T-complex protein/Chaperonin CPN60-1,                    | Increased                            | iTRAQ | Whole seed   | <i>O. sativa</i> /Han <i>et al.</i> , 2014           |



|                    |                                                             |                                                                         |         |              |                                                                                                      |
|--------------------|-------------------------------------------------------------|-------------------------------------------------------------------------|---------|--------------|------------------------------------------------------------------------------------------------------|
|                    | mitochondrial                                               |                                                                         |         |              | [1]                                                                                                  |
| Os10g32550         | Mitochondrial chaperonin-60 HSP60                           | Increased under aerobic conditions or constant under aerobic conditions | 2DE, WB | Mitochondria | <i>O. sativa</i> /Howell <i>et al.</i> , 2006 [2]                                                    |
| Os10g32550         | Mitochondrial chaperonin-60 HSP60                           | Increased, then decreased                                               | 2DE     | Whole seed   | <i>O. sativa</i> /Han <i>et al.</i> , 2014 [1]                                                       |
| Os10g32550         | Mitochondrial chaperonin-60 HSP60                           | Constant under anaerobic conditions                                     | WB      | Mitochondria | <i>O. sativa</i> /Howell <i>et al.</i> , 2007 [3]                                                    |
| P29185, Q43298     | Chaperonin CPN60-2, putative                                | Increased                                                               | WB      | Mitochondria | <i>Z. mays</i> /Logan <i>et al.</i> , 2001 [10]                                                      |
| At3g13470          | Chaperonin CPN60, mitochondrial                             | Increased                                                               | MS      | Whole seed   | <i>A. thaliana</i> /Law <i>et al.</i> , 2012 [5]                                                     |
| At3g23990          | HSP60                                                       | Increased and neosynthesized                                            | 2DE     | Whole seed   | <i>A. thaliana</i> /Galland <i>et al.</i> , 2014 [6]                                                 |
| At2g33210          | Chaperonin CPN60-2, mitochondrial                           | Increased and neosynthesized                                            | 2DE     | Whole seed   | <i>A. thaliana</i> /Galland <i>et al.</i> , 2014 [6]                                                 |
| P11143             | HSP70                                                       | Increased                                                               | WB      | Mitochondria | <i>Z. mays</i> /Logan <i>et al.</i> , 2001 [10]                                                      |
| At3g12580          | HSP70                                                       | Increased                                                               | MS      | Whole seed   | <i>A. thaliana</i> /Law <i>et al.</i> , 2012 [5]                                                     |
| At5g09590          | HSP70-2                                                     | Constant and neosynthesized                                             | 2DE     | Whole seed   | <i>A. thaliana</i> /Galland <i>et al.</i> , 2014 [6]                                                 |
| Os03g02260         | Putative heat shock 70 kDa protein, mitochondrial precursor | Increased under aerobic conditions                                      | 2DE, WB | Mitochondria | <i>O. sativa</i> /Howell <i>et al.</i> , 2006 [2]; <i>O. sativa</i> /Howell <i>et al.</i> , 2007 [3] |
| Os02g53420         | Putative heat shock 70 kDa protein, mitochondrial precursor | Increased under aerobic conditions                                      | 2DE, WB | Mitochondria | <i>O. sativa</i> /Howell <i>et al.</i> , 2006 [2]                                                    |
| Os03g02260         | Putative heat shock 70 kDa protein, mitochondrial precursor | Constant or decreased under anaerobic conditions                        | 2DE, WB | Mitochondria | <i>O. sativa</i> /Howell <i>et al.</i> , 2007 [3]                                                    |
| <b>Development</b> |                                                             |                                                                         |         |              |                                                                                                      |
| Os04g52110         | Late embryogenesis abundant protein,                        | Increased                                                               | iTRAQ   | Whole seed   | <i>O. sativa</i> /Han <i>et al.</i> , 2014                                                           |

|                          |                                                              |                                              |           |                             |                                                                                                   |
|--------------------------|--------------------------------------------------------------|----------------------------------------------|-----------|-----------------------------|---------------------------------------------------------------------------------------------------|
|                          | group 3, putative                                            |                                              |           |                             | [1]                                                                                               |
| Os04g52110               | Late embryogenesis abundant protein, group 3, putative       | Increased under anaerobic conditions         | 2DE       | Mitochondria                | <i>O. sativa</i> /Howell <i>et al.</i> , 2007 [3]                                                 |
| Os01g50910               | Late embryogenesis abundant protein, group 3                 | Decreased                                    | iTRAQ     | Whole seed                  | <i>O. sativa</i> /Han <i>et al.</i> , 2014 [1]                                                    |
| Os03g20680               | Late embryogenesis abundant protein                          | Decreased under aerobic conditions/Decreased | 2DE/iTRAQ | Mitochondria/<br>Whole seed | <i>O. sativa</i> /Howell <i>et al.</i> , 2006 [2]; <i>O. sativa</i> /Han <i>et al.</i> , 2014 [1] |
| At4g21020                | Late embryogenesis abundant protein (LEA)                    | Decreased and NOT neosynthesized             | 2DE       | Whole seed                  | <i>A. thaliana</i> /Galland <i>et al.</i> , 2014 [6]                                              |
| <b>Protein synthesis</b> |                                                              |                                              |           |                             |                                                                                                   |
| At1g26880                | 60S ribosomal protein L34 (RPL34A)                           | Increased                                    | MS        | Whole seed                  | <i>A. thaliana</i> /Law <i>et al.</i> , 2012 [5]                                                  |
| At4g02930                | Translation elongation factor EF-Tu precursor, mitochondrial | Increased and neosynthesized                 | 2DE       | Whole seed                  | <i>A. thaliana</i> /Galland <i>et al.</i> , 2014 [6]                                              |
| Os03g63410               | Translational elongation factor Tu                           | Increased under aerobic conditions           | 2DE       | Mitochondria                | <i>O. sativa</i> /Howell <i>et al.</i> , 2006 [2]                                                 |
| Os03g63410               | Translational elongation factor Tu                           | Decreased under anaerobic conditions         | 2DE       | Mitochondria                | <i>O. sativa</i> /Howell <i>et al.</i> , 2007 [3]                                                 |
| At2g45030                | Mitochondrial elongation factor                              | Increased                                    | 2DE       | Whole seed                  | <i>A. thaliana</i> /Fu <i>et al.</i> , 2005 [7]                                                   |
| <b>Replication</b>       |                                                              |                                              |           |                             |                                                                                                   |
| At5g59440                | Thymidylate kinase family protein                            | Increased                                    | MS        | Whole seed                  | <i>A. thaliana</i> /Law <i>et al.</i> , 2012 [5]                                                  |
| <b>RNA binding</b>       |                                                              |                                              |           |                             |                                                                                                   |
| At5g46460                | Pentatricopeptide (PPR) repeat-containing protein            | Decreased                                    | MS        | Whole seed                  | <i>A. thaliana</i> /Law <i>et al.</i> , 2012 [5]                                                  |
| <b>Redox homeostasis</b> |                                                              |                                              |           |                             |                                                                                                   |
| At5g42980                | Thioredoxin H-type 3; thiol-disulfide exchange intermediate  | Decreased                                    | MS        | Whole seed                  | <i>A. thaliana</i> /Law <i>et al.</i> , 2012 [5]                                                  |
| <b>Unknown function</b>  |                                                              |                                              |           |                             |                                                                                                   |
| At5g54770                | THI1, thiazole requiring                                     | Increased                                    | MS        | Whole seed                  | <i>A. thaliana</i> /Law <i>et al.</i> , 2012 [5]                                                  |

2DE: Two-Dimensional Gel Electrophoresis; iTRAQ: Isobaric Tags for Relative and Absolute Quantitation; MS: Mass Spectrometry; SRM: Selected Reaction Monitoring; WB: Western Blotting

**Table S2.** Overview of carbonylated, phosphorylated and S-nitrosylated mitochondrial proteins identified in germinating seeds using gel-based and gel-free proteomic approaches in different plant species.

| <i>Carbonylated Mitochondrial Proteins in Seeds</i> |                                                                        |                                                |        |                |                                                   |
|-----------------------------------------------------|------------------------------------------------------------------------|------------------------------------------------|--------|----------------|---------------------------------------------------|
| Accession Number (UniProt)                          | Name of Protein                                                        | Change in Carbonylation during Germination     | Method | Studied Sample | Species/References                                |
| <b>Stress response/Redox homeostasis</b>            |                                                                        |                                                |        |                |                                                   |
| B7ERQ1                                              | Peroxiredoxin                                                          | Significantly increased in carbonylation level | MS     | Whole seed     | <i>O. sativa</i> /Zhang <i>et al.</i> , 2016 [12] |
| Q43803                                              | Superoxide dismutase, Mn                                               | <i>Not determined</i>                          | MS     | Whole seed     | <i>O. sativa</i> /Zhang <i>et al.</i> , 2016 [12] |
| <b>Chaperones</b>                                   |                                                                        |                                                |        |                |                                                   |
| Q8GTB0                                              | Putative heat shock 70 KD protein, mitochondrial                       | Significantly increased in carbonylation level | MS     | Whole seed     | <i>O. sativa</i> /Zhang <i>et al.</i> , 2016 [12] |
| Q9LDZ0                                              | Heat shock protein Hsp70-10                                            | Increased during germination                   | 2DE    | Whole seed     | <i>A. thaliana</i> /Job <i>et al.</i> , 2005 [13] |
| Q10RW9                                              | Chaperonin, probable CPN60-1                                           | Gradually decreasing in carbonylation level    | MS     | Whole seed     | <i>O. sativa</i> /Zhang <i>et al.</i> , 2016 [12] |
| <b>Metabolism</b>                                   |                                                                        |                                                |        |                |                                                   |
| Q93Y73                                              | Aspartate-semialdehyde dehydrogenase family protein, mitoch./chloropl. | Gradually increasing in carbonylation level    | MS     | Whole seed     | <i>O. sativa</i> /Zhang <i>et al.</i> , 2016 [12] |
| Q2QMG2                                              | Methylcrotonoyl-CoA carboxylase subunit alpha, mitochondrial           | Gradually decreasing in carbonylation level    | MS     | Whole seed     | <i>O. sativa</i> /Zhang <i>et al.</i> , 2016 [12] |
| <b>Import</b>                                       |                                                                        |                                                |        |                |                                                   |
| Q0DYM2                                              | Zinc finger, Tim10/DDP-type family protein                             | <i>Not determined</i>                          | MS     | Whole seed     | <i>O. sativa</i> /Zhang <i>et al.</i> , 2016 [12] |
| <b>Mitochondrial trafficking</b>                    |                                                                        |                                                |        |                |                                                   |
| Q6ATR5                                              | Mitochondrial Rho GTPase                                               | <i>Not determined</i>                          | MS     | Whole seed     | <i>O. sativa</i> /Zhang <i>et al.</i> , 2016 [12] |
| <b>Tricarboxylic acid cycle</b>                     |                                                                        |                                                |        |                |                                                   |

|                                                       |                                                                                                |                                                |     |            |                                                   |
|-------------------------------------------------------|------------------------------------------------------------------------------------------------|------------------------------------------------|-----|------------|---------------------------------------------------|
| Q9SIB9                                                | Aconitate hydratase (ACO2)                                                                     | Increased during germination                   | 2DE | Whole seed | <i>A. thaliana</i> /Job <i>et al.</i> , 2005 [13] |
| Q9XGU8                                                | Isocitrate dehydrogenase [NADP]                                                                | Gradually increasing in carbonylation level    | MS  | Whole seed | <i>O. sativa</i> /Zhang <i>et al.</i> , 2016 [12] |
| Q7XMA0                                                | Isocitrate dehydrogenase [NADP]                                                                | Significantly increased in carbonylation level | MS  | Whole seed | <i>O. sativa</i> /Zhang <i>et al.</i> , 2016 [12] |
| B9FVD6                                                | Putative uncharacterized protein, probable SDH1                                                | <i>Not determined</i>                          | MS  | Whole seed | <i>O. sativa</i> /Zhang <i>et al.</i> , 2016 [12] |
| <b>Respiration</b>                                    |                                                                                                |                                                |     |            |                                                   |
| Q0JKB4                                                | ATP synthase subunit beta, mitochondrial                                                       | Gradually decreasing in carbonylation level    | MS  | Whole seed | <i>O. sativa</i> /Zhang <i>et al.</i> , 2016 [12] |
| P83483,<br>Q9C5A9,<br>P83484                          | ATP synthase subunit beta, mitochondrial precursor                                             | Increased during germination                   | 2DE | Whole seed | <i>A. thaliana</i> /Job <i>et al.</i> , 2005 [13] |
| <b>Unknown function</b>                               |                                                                                                |                                                |     |            |                                                   |
| A3AXT8                                                | Putative uncharacterized protein                                                               | Gradually decreasing in carbonylation level    | MS  | Whole seed | <i>O. sativa</i> /Zhang <i>et al.</i> , 2016 [12] |
| Q6AT24                                                | Os05g0176500 protein                                                                           | <i>Not determined</i>                          | MS  | Whole seed | <i>O. sativa</i> /Zhang <i>et al.</i> , 2016 [12] |
| Q7Y0E6                                                | LOC496049 protein, putative                                                                    | <i>Not determined</i>                          | MS  | Whole seed | <i>O. sativa</i> /Zhang <i>et al.</i> , 2016 [12] |
| <b>Phosphorylated mitochondrial proteins in seeds</b> |                                                                                                |                                                |     |            |                                                   |
| <b>Chaperones</b>                                     |                                                                                                |                                                |     |            |                                                   |
| O64960                                                | Heat shock protein HSP22                                                                       | <i>Not determined</i>                          | MS  | Whole seed | <i>Z. mays</i> /Lu <i>et al.</i> , 2008 [14]      |
| <b>Tricarboxylic acid cycle</b>                       |                                                                                                |                                                |     |            |                                                   |
| Q6Z5N4                                                | Similar to pyruvate dehydrogenase E1 component alpha subunit-mitochondrial precursor (PDHE1-A) | <i>Not determined</i>                          | MS  | Whole seed | <i>O. sativa</i> /Han <i>et al.</i> , 2014 [15]   |
| <b>Respiration</b>                                    |                                                                                                |                                                |     |            |                                                   |
| Q1KKK0                                                | Cytochrome <i>c</i> biogenesis FN                                                              | <i>Not determined</i>                          | MS  | Whole seed | <i>Z. mays</i> /Lu <i>et al.</i> , 2008 [14]      |
| Q8GT70                                                | Alternative oxidase AOX3 precursor                                                             | <i>Not determined</i>                          | MS  | Whole seed | <i>Z. mays</i> /Lu <i>et al.</i> , 2008           |

| [14]                                                         |                                                    |                       |     |                    |                                           |
|--------------------------------------------------------------|----------------------------------------------------|-----------------------|-----|--------------------|-------------------------------------------|
| <b>Protein synthesis</b>                                     |                                                    |                       |     |                    |                                           |
| B7SDE4                                                       | 60S ribosomal protein L5                           | Increased             | MS  | Whole seed/Nucleus | <i>O. sativa</i> /Li et al., 2015 [16]    |
| A0A0P0VB<br>K7                                               | Ribosomal protein L18/L5 domain containing protein | Increased             | MS  | Whole seed/Nucleus | <i>O. sativa</i> /Li et al., 2015 [16]    |
| <b><i>S-nitrosylated mitochondrial proteins in seeds</i></b> |                                                    |                       |     |                    |                                           |
| P83483,<br>Q9C5A9,<br>P83484                                 | ATP synthase subunit beta                          | <i>Not determined</i> | 1DE | Whole seed         | <i>A. thaliana</i> /Arc et al., 2011 [17] |

1DE: One-Dimensional Gel Electrophoresis; 2DE: Two-Dimensional Gel Electrophoresis; MS: Mass Spectrometry.

## References

1. Han, Z.; He, D.; Li, M.; Yang, P. In-depth proteomic analysis of rice embryo reveals its important roles in seed germination. *Plant Cell Physiol.* **2014**, *55*, 1826–1847.
2. Howell, K.A.; Millar, A.H.; Whelan, J. Ordered assembly of mitochondria during rice germination begins with promitochondrial structures rich in component of the protein import apparatus. *Plant Mol. Biol.* **2006**, *60*, 201–223.
3. Howell, K.A.; Cheng, K.; Murcha, M.W.; Jenkin, L.E.; Millar, A.H.; Whelan, J. Oxygen initiation of respiration and mitochondrial biogenesis in rice. *J. Biol. Chem.* **2007**, *282*, 15619–15631.
4. Wang, W.-Q.; Møller, I.M.; Song, S.-Q. Proteomic analysis of embryonic axis of *Pisum sativum* seeds during germination and identification of proteins associated with loss of desiccation tolerance. *J. Proteom.* **2012**, *77*, 68–86.
5. Law, S.R.; Narsai, R.; Taylor, N.L.; Delannoy, E.; Carrie, C.; Giraud, E.; Millar, A.H.; Small, I.; Whelan, J. Nucleotide and RNA metabolism prime translational initiation in the earliest events of mitochondrial biogenesis during Arabidopsis germination. *Plant Physiol.* **2012**, *158*, 1610–1627.
6. Galland, M.; Huguet, R.; Aec, E.; Cueff, G.; Job, D.; Rajjou, L. Dynamic proteomics emphasizes the importance of selective mRNA translation and protein turnover during Arabidopsis seed germination. *Mol. Cell Proteom.* **2014**, *13*, 252–268.
7. Fu, Q.; Wang, B.-C.; Jin, X.; Li, H.-B.; Han, P.; Wei, K.-H.; Zhang, X.-M.; Zhu, Y.-X. Proteomic analysis and extensive protein identification from dry, germinating Arabidopsis seed and young seedlings. *J. Biochem. Mol. Biol.* **2005**, *38*, 650–660.
8. Taylor, N.L.; Howell, K.A.; Heazlewood, J.L.; Tan, T.Y.W.; Narsai, R.; Huang, S.; Whelan, J.; Millar, A.H. Analysis of the rice mitochondrial carrier family reveals anaerobic accumulation of a basic amino acid carrier involved in arginine metabolism during seed germination. *Plant Physiol.* **2010**, *154*, 691–704.
9. Wang, W.-Q.; Song, B.-Y.; Deng, Z.-Y.; Wang, Y.; Liu, S.-J.; Møller, I.M.; Song, S.-Q. Proteomic analysis of lettuce seed germination and thermoinhibition by sampling of individual seeds at germination and removal of storage proteins by polyethylene glycol fractionation. *Plant Physiol.* **2015**, *167*, 1332–1350.
10. Logan, D.C.; Millar, A.H.; Sweetlove, L.J.; Hill, S.A.; Leaver, C.J. Mitochondrial biogenesis during germination in maize embryos. *Plant Physiol.* **2001**, *125*, 662–672.
11. Gallardo, K.; Job, C.; Groot, S.P.C.; Puype, M.; Demol, H.; Vandekerckhove, J.; Job, D. Proteomic analysis of Arabidopsis seed germination and priming. *Plant Physiol.* **2001**, *126*, 835–848.
12. Zhang, H.; He, D.; Yu, J.; Li, M.; Damaris, R.N.; Gupta, R.; Kim, S.T.; Yang, P. Analysis of dynamic protein carbonylation in rice embryo during germination through AP-SWATH. *Proteomics* **2016**, *16*, 989–1000, doi:10.1002/pmic.201500248.
13. Job, C.; Rajjou, L.; Lovigny, Y.; Belghazi, M.; Job, D. Patterns of protein oxidation in arabidopsis seeds and during germination. *Plant Physiol.* **2005**, *138*, 790–802.
14. Lu, C.-T.; Meng, L.-B.; Yang, C.-P.; Liu, G.-F.; Liu, G.-J.; Ma, W.; Wang, B.-C. A shotgun phosphoproteomics analysis of embryos in germinated maize seeds. *Planta* **2008**, *228*, 1029–1041.
15. Han, C.; Yang, P.; Sakata, K.; Komatsu, S. Quantitative Proteomics Reveals the Role of Protein Phosphorylation in Rice Embryos during Early Stages of Germination. *J. Proteome Res.* **2014**, *13*, 1766–1782.
16. Li, M.; Yin, X.; Sakata, K.; Yang, P.; Komatsu, S. Proteomic analysis of phosphoproteins in the rice nucleus during the early stage of seed germination. *J. Proteome Res.* **2015**, *14*, 2884–2896.
17. Arc, E.; Galland, M.; Cueff, G.; Godin, B.; Lounifi, I.; Job, D.; Rajjou, L. Reboot the system thanks to protein post-translational modifications and proteome diversity: How quiescent seeds restart their metabolism to prepare seedling establishment. *Proteomics* **2011**, *11*, 1606–1618.

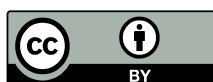

Supplement: proteomes-04-00019-s001.pdf [file proteomes-04-00019-s001.pdf]
